# Supplementary material for: Size-Dependent Chlorinated Nitrogen-Doped Carbon Nanotubes: Their Use as Electrochemical Detectors for Catechol and Resorcinol
Source: Hindawi journal article supplement (doi:10.1155/2023/7977453), 2023-07-24
Supplement: f1 [file 7977453.f1.docx]

**SUPPLEMENTARY DATA**

**Table S1** Decomposition temperatures and residual masses (determined by TGA and DTGA) of the un-purified and purified (P) chlorinated NCNTs generated from solutions containing different CH3CN:DCB volume ratios.

| **CH3CN:DCB volume ratio /%** | **Decomposition temperature /°C** | **Residual mass /%** |
| --- | --- | --- |
| 66.7:33.3 | 651 & 737 | 19.3 |
| 66.7:33.3 (P) | 671 | 7.7 |
| 33.3:66.7 | 610 & 643 | 11.0 |
| 33.3:66.7 (P) | 600 | 0 |


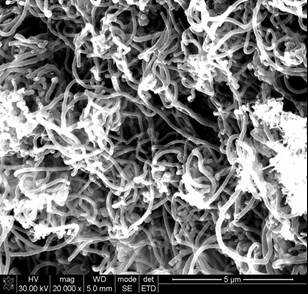


B

A


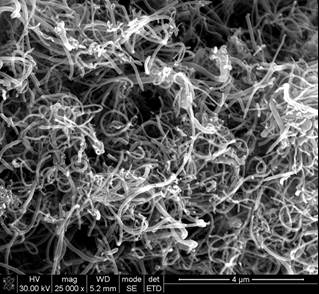


D

C

**Figure S1** SEM images and diameter distributions curves of purified CNMs generated from CH3CN feed containing 33.3 (a and b) and 66.7 (c and d) vol.% DCB by bubbling CVD method.


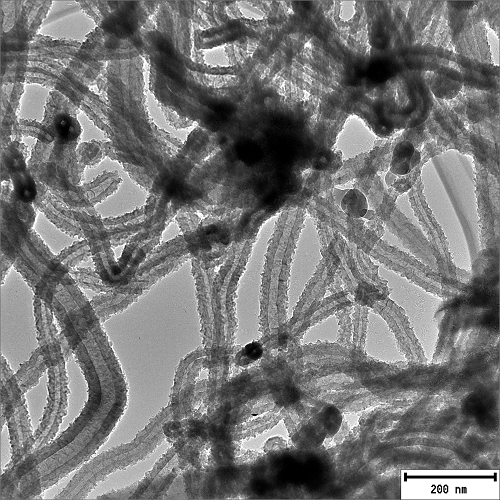

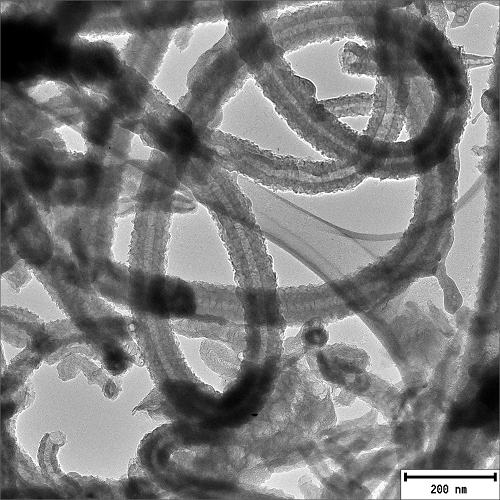


A

B

**Figure S2** TEM images of unpurified chlorinated NCNTs prepared in (a) 1:2 and 2:1 volume ratio of CH3CN:DCB solvent mixture.

**Figure S3** Survey scan XPS spectra of NCNTs generated from various CH3CN:DCB solvent mixture.

B

A

**Figure S4** Bar chart of repeatability tests on NCNTs(2:1)/GCE in the presence of both CC and RS (a) CC measurement and (b) RS measurement.


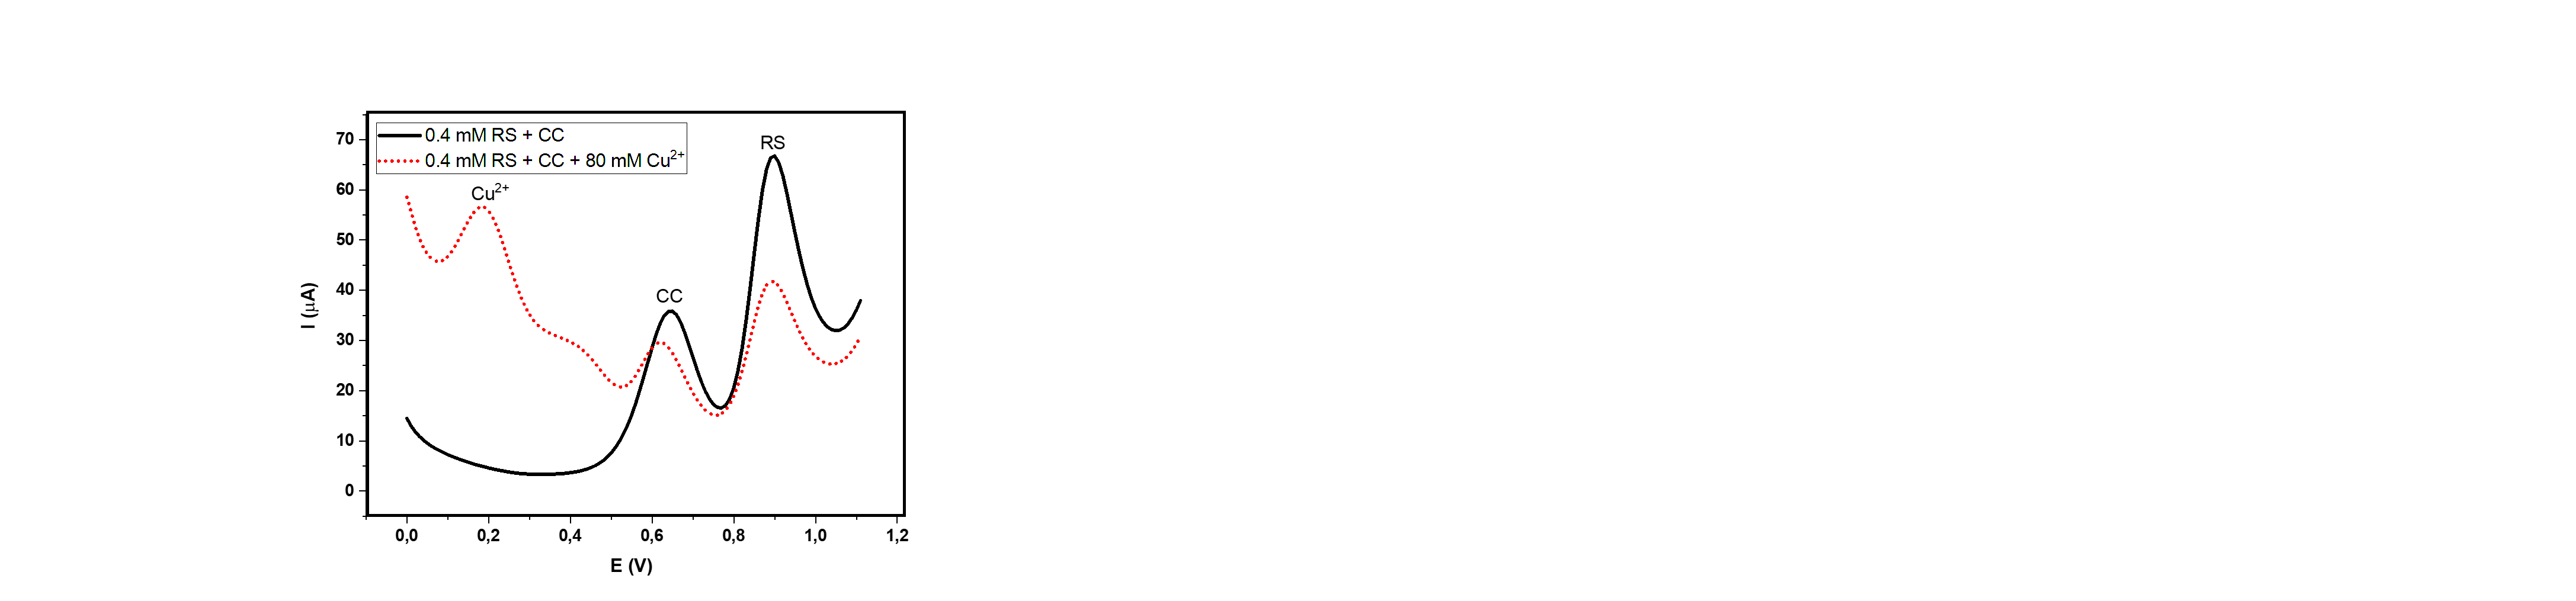


**Figure S5** DPV curves for detection of 0.4 mM RS and CC in 0.1 M PBS pH 2 over NCNTs(2:1)/GCE before ( **–** solid lines) and after (**….** dotted lines) addition of 80 mM Cu2+ as interference ion.
